# Supplementary material
Source: Springer Nature journal article supplement (https://www.springermedizin.de/resource/supplementary/13023_2013_734_MOESM1_ESM.pdf/9642934)

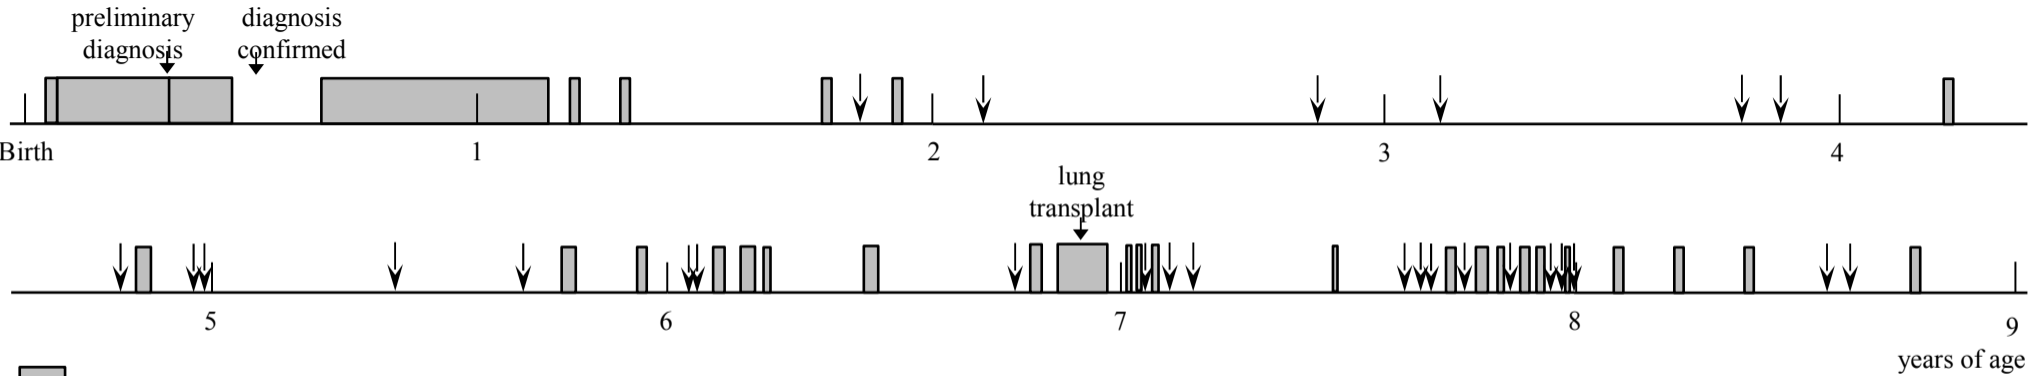

hospital admission  
outpatient consult

Supplement: MOESM1 [file 9642934]
